# Supplementary material
Source: ML conference proceedings conference paper supplement (https://openreview.net/forum?id=XCqrMBh1Uj)
Supplement: supplementary_material [file 11457_Appendix.pdf › 11457_Supplementary_material/11457_Appendix.pdf]

## A KV CACHE COMPRESSION ILLUSTRATION

Figures 11 to 14 show the illustration of other KV cache compression methods.

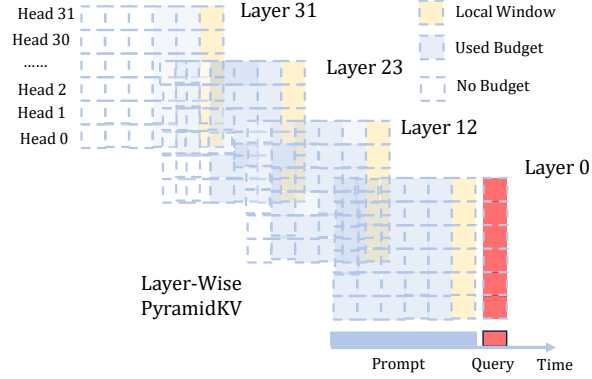

Figure 11: PyramidKV compresses the KV cache by allocating more cache in lower layers and less in higher ones.

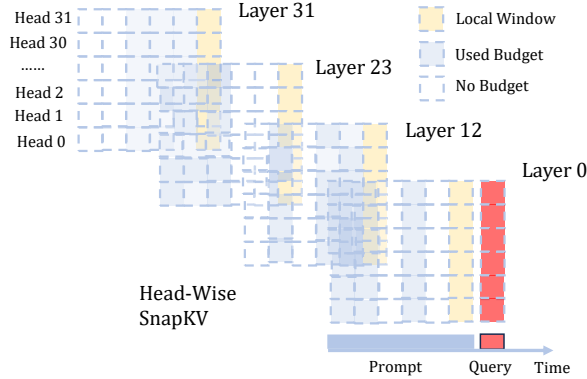

Figure 12: SnapKV compresses the KV cache by selecting grouped important positions for each attention head.

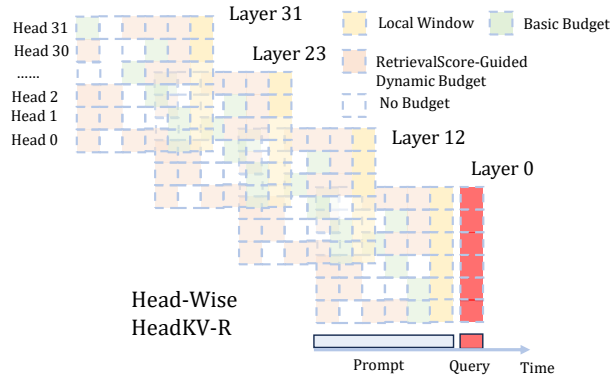

Figure 13: HeadKV-R compresses the KV cache by focusing on the retrieval-and-paste mechanism for each head.

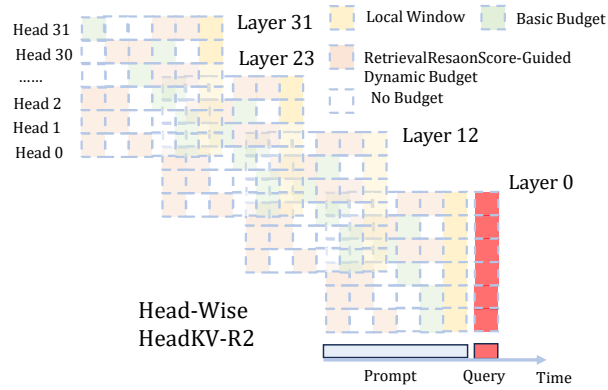

Figure 14: HeadKV-R2 compresses the KV cache by considering the contextual and reasoning skills for each head.

## B NEEDLE EXAMPLE

1. **Question:** “What are good ways to spend time in campus?”  
**Needle:** “The good ways to spend time in campus include relax and do nothing.”  
**Answer:** “Relax and do nothing.”
2. **Question:** “What habits are beneficial for health during Ph.D. career?”  
**Needle:** “The beneficial habits during Ph.D. career contain exercise and healthy diet.”  
**Answer:** “Exercise and healthy diet.”
3. **Question:** “Which year did Tom start high school?”  
**Needle:** “Tom was born in 2005. Tom started high school fifteen years after he was born.”  
**Answer:** “Tom started high school in 2020.”

## C KV CACHE BUDGET ALLOCATION

Algorithms 1 and 2 present the REAL method for KV cache compression by selecting the top- $k$  entries. The procedure first checks whether the KV length exceeds the budget. If it does not, the original  $K$  and  $V$  are returned unchanged. If it does, the full query window is retained, and the top- $k$  most relevant historical tokens within the budget are selected to form the compressed KV.

---

**Algorithm 1** Procedure for KV budget allocation.

---

**Input:** Total budget  $b_c$ , allocation ratio  $\beta$ , head  $(i, j)$ , layer count  $L$ , head count in a layer  $H$ , INFsc of  $j_{th}$  head  $(i, j)$  in the  $i_{th}$  layer  $H_{j,inf}$

**Output:** Capacity  $C_{i,j}$

- 1: Basic budget  $b_{base} = b \left(1 - \frac{1}{\beta}\right)$
  - 2: Global dynamic budget pool  $B_{total} = \frac{b}{\beta} L H$
  - 3:  $i_{th}$  layer's total INFScore  $L_{i,\alpha} = \sum_j H_{j,inf}$
  - 4:  $L_s \leftarrow \sum_{i=0}^{L-1} L_{i,\alpha}$ ,
  - 5: Relative Importance of head and layer  $S_{j,h} \leftarrow \frac{H_{j,inf}}{L_s}, L_{i,h} = \frac{L_{i,\alpha}}{L_s}$
  - 6: Dynamic allocation  $b_{i,j}^{dyn} = B_{total} \cdot (\gamma + L_{i,h}) \cdot S_{j,h}$
  - 7: Total KV cache budget  $b_{i,j} = b_{base} + b_{i,j}^{dyn}$
  - 8: **return**  $C_{i,j} = \lfloor \max(0, b_{i,j}) + 0.5 \rfloor$
- 

---

**Algorithm 2** Procedure for KV entry selection.

---

**Input:** key states  $K$ , query states  $Q$ , value states  $V$ , budget  $C$

**Output:** Final\_KV

- 1: **if** current\_KV\_length  $\leq B$  **then**
  - 2:     **return**  $K, V$
  - 3: **end if**
  - 4:  $W \leftarrow$  Last window-size tokens from KV
  - 5:  $Q_H \leftarrow$  Remaining history from KV
  - 6: Attention relevance  $A = \text{Softmax}\left(Q_{window} H^T / \sqrt{d_k}\right)$
  - 7: Budget for history  $C_H = C - \text{window\_size}$
  - 8: TopK\_indices = TopK( $A, k = B_H$ )
  - 9: Relevant history  $H' = \text{Gather}(H, \text{TopK\_indices})$
  - 10: Final\_KV = Concat( $H', W$ )
  - 11: **return** Final\_KV
-

## D DATASET DETAILS

Table 5 shows the details of sixteen QA datasets from LongBench (Bai et al., 2024a), four QA datasets from LooGLE (Li et al., 2024a), and eleven extended-length datasets from LongBench v2 (Bai et al., 2024b).

Table 5: Dataset Details.

| Label            | Task                           | Avg Len |
|------------------|--------------------------------|---------|
| NrtvQA           | NarrativeQA                    | 18,409  |
| Qasper           | Qasper                         | 3,619   |
| MF-en            | MultiFieldQA-EN                | 4,559   |
| HotpotQA         | HotpotQA                       | 9,151   |
| 2WikiMultiHopQA  | 2WikiMultiHopQA                | 4,887   |
| Musique          | Musique                        | 11,214  |
| QMSum            | QMSum                          | 10614   |
| MultiNews        | MultiNews                      | 2113    |
| TREC             | TREC                           | 5177    |
| TriviaQA         | TriviaQA                       | 8209    |
| SAMSum           | SAMSum                         | 6258    |
| PCount           | PassageCount                   | 11141   |
| Pre              | PassageRetrieval-en            | 9289    |
| LCC              | LCC                            | 1235    |
| RB-P             | RepoBench-P                    | 4206    |
| GovReport        | Government report              | 8734    |
| Doc.QA           | Comprehension & reasoning      | 15,498  |
| Info.Retrieval   | Multiple information retrieval | 14,808  |
| Timeline         | Timeline reorder               | 15,425  |
| Computation      | Computation                    | 17,001  |
| Literary         | Literary                       | 72K     |
| Legal            | Legal                          | 28K     |
| Detective        | Detective                      | 70K     |
| Detective        | Academic                       | 27K     |
| Financial        | Financial                      | 49K     |
| Govern           | Government reports             | 20K     |
| UserGuide        | User guide QA                  | 61K     |
| Many-Shot        | Many-Shot                      | 71K     |
| Dialogue History | Dialogue history QA            | 77K     |
| Table            | Table QA                       | 42K     |
| KnGraph          | Knowledge graph reasoning      | 52K     |

## E COMPREHENSIVE EXPERIMENTAL RESULTS ON LONGBENCH

Table 6 shows that the REAL method achieves substantial improvements over the baselines across different settings.

Table 6: Results for varying KV cache sizes (64, 128, 256, 512, 1024) on Llama-3-8B-Instruct and Mistral-7B-Instruct, with baseline results reported by Fu et al. (2025).

| Method                              | Single-Doc QA                                 |              |              | Multi-Doc QA |              |              | Avg.         | Long Dependency QA                         |              |             |              | Avg.        | $\beta$      |
|-------------------------------------|-----------------------------------------------|--------------|--------------|--------------|--------------|--------------|--------------|--------------------------------------------|--------------|-------------|--------------|-------------|--------------|
|                                     | NartQA Qasper MF-en HotpotQA 2WikiMQA Musique |              |              |              |              |              |              | DocQA Info. Retrieval Timeline Computation |              |             |              |             |              |
| Llama-3-8B-Instruct, KV Size = Full |                                               |              |              |              |              |              |              |                                            |              |             |              |             |              |
| FullKV                              | 25.56                                         | 32.07        | 39.71        | 43.57        | 35.28        | 21.18        | 32.90        | 8.73                                       | 11.21        | 0.67        | 7.43         | 7.01        | -            |
| Llama-3-8B-Instruct, KV Size = 64   |                                               |              |              |              |              |              |              |                                            |              |             |              |             |              |
| PyramidKV                           | 21.17                                         | 13.66        | 29.34        | 34.86        | 23.46        | 15.88        | 23.06        | 8.27                                       | 9.31         | 0.63        | 6.86         | 6.27        | -            |
| SnapKV                              | 20.51                                         | 12.80        | 31.69        | 37.02        | 25.91        | 17.02        | 24.16        | 8.84                                       | 9.43         | <b>0.66</b> | 6.18         | 6.28        | -            |
| HeadKV-R                            | 22.67                                         | 23.54        | 37.51        | 37.45        | 29.76        | 19.01        | 28.32        | 8.80                                       | 10.51        | <b>0.58</b> | 6.68         | 6.64        | 2            |
| HeadKV-R2                           | 23.21                                         | 25.33        | <b>38.71</b> | 40.64        | <b>31.33</b> | 19.35        | 29.76        | <b>9.46</b>                                | 10.66        | 0.61        | 6.92         | 6.91        | 1.2          |
| REAL                                | <b>26.22</b>                                  | <b>26.30</b> | 38.05        | <b>43.89</b> | 31.06        | <b>20.75</b> | <b>31.05</b> | 9.23                                       | <b>10.67</b> | 0.63        | <b>7.42</b>  | <b>6.99</b> | <b>1.351</b> |
| Llama-3-8B-Instruct, KV Size = 128  |                                               |              |              |              |              |              |              |                                            |              |             |              |             |              |
| PyramidKV                           | 22.01                                         | 17.05        | 31.52        | 39.27        | 28.99        | 18.34        | 26.20        | 8.89                                       | 9.63         | 0.61        | 6.72         | 6.46        | -            |
| SnapKV                              | 22.11                                         | 15.79        | 31.01        | 41.12        | 29.20        | 19.35        | 26.43        | 8.36                                       | 9.46         | <b>0.79</b> | 6.56         | 6.29        | -            |
| HeadKV-R                            | 23.49                                         | 25.39        | 38.15        | 42.45        | 32.84        | 19.95        | 30.38        | 8.87                                       | 10.35        | 0.78        | 7.52         | 6.88        | 1.5          |
| HeadKV-R2                           | 21.80                                         | 29.19        | <b>41.89</b> | 43.73        | <b>35.01</b> | 20.40        | 32.00        | <b>9.60</b>                                | 11.13        | 0.67        | 7.22         | 7.16        | 1.01         |
| REAL                                | <b>25.47</b>                                  | <b>29.95</b> | 38.02        | <b>44.67</b> | 34.28        | <b>20.66</b> | <b>32.18</b> | 9.20                                       | <b>11.32</b> | 0.62        | <b>7.83</b>  | <b>7.24</b> | <b>1.351</b> |
| Llama-3-8B-Instruct, KV Size = 256  |                                               |              |              |              |              |              |              |                                            |              |             |              |             |              |
| PyramidKV                           | 23.94                                         | 20.27        | 36.27        | 42.51        | 31.44        | 19.99        | 29.07        | 8.66                                       | 10.61        | 0.53        | 6.98         | 6.70        | -            |
| SnapKV                              | 23.38                                         | 20.18        | 37.65        | 42.80        | 33.23        | 20.01        | 29.54        | 9.04                                       | 10.59        | 0.53        | 7.53         | 6.92        | -            |
| HeadKV-R                            | 23.83                                         | 29.04        | <b>39.90</b> | 42.36        | 33.58        | 20.57        | 31.54        | 9.05                                       | 11.15        | 0.52        | 7.22         | 6.99        | 1.1          |
| HeadKV-R2                           | 24.68                                         | <b>30.49</b> | 38.59        | 44.32        | 36.41        | 20.54        | 32.51        | 9.47                                       | 11.56        | 0.54        | <b>7.65</b>  | 7.31        | 1.1          |
| REAL                                | <b>26.10</b>                                  | 30.26        | 37.14        | <b>44.61</b> | <b>38.53</b> | <b>22.40</b> | <b>33.17</b> | <b>10.01</b>                               | <b>11.71</b> | 0.53        | 7.23         | <b>7.37</b> | <b>1.351</b> |
| Llama-3-8B-Instruct, KV Size = 512  |                                               |              |              |              |              |              |              |                                            |              |             |              |             |              |
| PyramidKV                           | 24.69                                         | 23.65        | 35.10        | 43.25        | 31.16        | 20.06        | 29.65        | 8.90                                       | 10.62        | 0.74        | <b>7.57</b>  | 6.96        | -            |
| SnapKV                              | 25.47                                         | 23.75        | 38.64        | 43.66        | 33.98        | 19.83        | 30.89        | 9.00                                       | 11.07        | 0.63        | 7.34         | 7.01        | -            |
| HeadKV-R                            | 23.84                                         | 29.21        | <b>39.79</b> | 44.41        | 36.09        | 20.59        | 32.32        | 9.13                                       | 11.61        | <b>0.56</b> | 7.12         | 7.11        | 1.2          |
| HeadKV-R2                           | 24.75                                         | 29.75        | 38.03        | <b>44.43</b> | 36.45        | 21.67        | 32.51        | <b>9.34</b>                                | 11.26        | <b>0.56</b> | 7.54         | 7.18        | 1.1          |
| REAL                                | <b>26.13</b>                                  | <b>31.58</b> | 38.94        | 44.23        | <b>36.76</b> | <b>22.82</b> | <b>33.41</b> | 9.32                                       | <b>11.97</b> | 0.55        | 7.34         | <b>7.30</b> | <b>1.351</b> |
| Llama-3-8B-Instruct, KV Size = 1024 |                                               |              |              |              |              |              |              |                                            |              |             |              |             |              |
| PyramidKV                           | 25.38                                         | 26.83        | 36.90        | 44.09        | 34.24        | 21.49        | 31.49        | 8.98                                       | 11.41        | 0.53        | 6.96         | 6.97        | -            |
| SnapKV                              | 25.76                                         | 27.50        | 38.38        | 43.40        | 34.81        | 20.07        | 31.65        | 9.61                                       | 11.34        | 0.53        | 7.22         | 7.18        | -            |
| HeadKV-R                            | 24.85                                         | 30.94        | <b>39.82</b> | 43.52        | 36.58        | 20.37        | 32.68        | 9.20                                       | <b>11.67</b> | <b>0.55</b> | 7.71         | <b>7.28</b> | 1.2          |
| HeadKV-R2                           | 24.66                                         | 30.82        | 39.56        | 43.97        | 36.47        | 22.24        | 32.95        | 9.02                                       | 11.51        | 0.47        | <b>7.85</b>  | 7.21        | 1.2          |
| REAL                                | 25.57                                         | <b>32.37</b> | 39.50        | <b>44.72</b> | <b>36.87</b> | <b>22.45</b> | <b>33.58</b> | <b>9.68</b>                                | 11.48        | 0.49        | 7.12         | 7.19        | <b>1.351</b> |
| Mistral-7B-Instruct, KV Size = Full |                                               |              |              |              |              |              |              |                                            |              |             |              |             |              |
| FullKV                              | 26.63                                         | 32.99        | 49.34        | 42.77        | 27.35        | 18.78        | 32.98        | 12.17                                      | 15.52        | 0.49        | 10.03        | 9.55        | -            |
| Mistral-7B-Instruct, KV Size = 64   |                                               |              |              |              |              |              |              |                                            |              |             |              |             |              |
| PyramidKV                           | 20.91                                         | 19.61        | 38.05        | 32.18        | 22.87        | 15.26        | 24.81        | 10.64                                      | 11.69        | 0.56        | 9.06         | 7.99        | -            |
| SnapKV                              | 19.95                                         | 18.63        | 38.16        | 31.24        | 21.39        | 13.81        | 23.86        | 10.41                                      | 11.49        | 0.46        | 9.38         | 7.94        | -            |
| HeadKV-R                            | 24.23                                         | 25.22        | 46.02        | 38.82        | 26.05        | 17.41        | 29.63        | 10.94                                      | 13.14        | 0.63        | 9.11         | 8.46        | 1.5          |
| HeadKV-R2                           | 21.77                                         | 26.57        | <b>48.39</b> | <b>40.12</b> | <b>26.76</b> | 16.21        | 29.97        | 11.19                                      | <b>13.94</b> | 0.48        | 9.87         | 8.87        | 1.2          |
| REAL                                | <b>24.34</b>                                  | <b>27.45</b> | 47.31        | 40.04        | 25.14        | <b>17.34</b> | <b>30.27</b> | <b>12.47</b>                               | 13.48        | <b>0.66</b> | <b>10.17</b> | <b>9.20</b> | <b>1.351</b> |
| Mistral-7B-Instruct, KV Size = 128  |                                               |              |              |              |              |              |              |                                            |              |             |              |             |              |
| PyramidKV                           | 21.76                                         | 21.98        | 43.72        | 32.76        | 22.73        | 15.59        | 26.42        | 10.64                                      | 11.90        | 0.47        | 8.69         | 7.93        | -            |
| SnapKV                              | 21.47                                         | 21.95        | 45.24        | 33.88        | 21.83        | 15.53        | 26.65        | 10.86                                      | 12.24        | 0.57        | 8.81         | 8.12        | -            |
| HeadKV-R                            | 23.97                                         | 29.60        | 48.40        | 39.66        | 26.31        | 18.13        | 31.01        | 11.43                                      | 13.04        | 0.53        | 10.26        | 8.82        | 1.5          |
| HeadKV-R2                           | 25.04                                         | 27.95        | <b>48.48</b> | <b>41.28</b> | 27.65        | 18.05        | 31.41        | 11.44                                      | 13.08        | <b>0.63</b> | 10.20        | 8.84        | 1.1          |
| REAL                                | <b>25.99</b>                                  | <b>30.22</b> | 48.45        | 40.78        | <b>28.34</b> | <b>18.38</b> | <b>32.03</b> | <b>11.86</b>                               | <b>14.08</b> | 0.49        | <b>10.85</b> | <b>9.32</b> | <b>1.351</b> |
| Mistral-7B-Instruct, KV Size = 256  |                                               |              |              |              |              |              |              |                                            |              |             |              |             |              |
| PyramidKV                           | 21.42                                         | 25.36        | 47.94        | 38.75        | 25.82        | 15.30        | 29.10        | 11.57                                      | 12.35        | 0.56        | 9.51         | 8.50        | -            |
| SnapKV                              | 22.26                                         | 24.94        | 48.30        | 36.76        | 25.16        | 14.93        | 28.72        | 11.07                                      | 12.39        | 0.53        | 9.13         | 8.28        | -            |
| HeadKV-R                            | 24.98                                         | 29.31        | 49.01        | 41.36        | 27.16        | 17.34        | 31.53        | 11.94                                      | 13.30        | <b>0.63</b> | 10.95        | 9.21        | 2            |
| HeadKV-R2                           | 24.24                                         | <b>31.02</b> | <b>50.76</b> | 42.11        | 26.14        | 18.47        | 32.24        | 12.37                                      | <b>13.88</b> | 0.48        | 9.86         | 9.15        | 1.005        |
| REAL                                | <b>26.98</b>                                  | 30.60        | 49.07        | <b>42.32</b> | <b>27.36</b> | <b>19.04</b> | <b>32.56</b> | <b>12.48</b>                               | 13.51        | 0.53        | <b>11.26</b> | <b>9.45</b> | <b>1.351</b> |
| Mistral-7B-Instruct, KV Size = 512  |                                               |              |              |              |              |              |              |                                            |              |             |              |             |              |
| PyramidKV                           | 23.07                                         | 28.97        | 48.37        | 39.54        | 25.63        | 16.59        | 30.36        | 11.34                                      | 13.32        | <b>0.65</b> | 10.81        | 9.03        | -            |
| SnapKV                              | 24.18                                         | 28.87        | 48.74        | 38.84        | 25.48        | 15.04        | 30.19        | 11.96                                      | 13.47        | 0.52        | 10.50        | 9.11        | -            |
| HeadKV-R                            | 24.97                                         | 30.94        | 49.45        | 42.25        | 26.34        | 18.54        | 32.08        | 12.09                                      | 13.88        | 0.62        | <b>10.94</b> | 9.38        | 1.01         |
| HeadKV-R2                           | 25.59                                         | <b>31.33</b> | <b>50.26</b> | <b>42.66</b> | 27.20        | <b>19.37</b> | 32.74        | 11.62                                      | <b>15.61</b> | 0.50        | 9.97         | <b>9.43</b> | 1.005        |
| REAL                                | <b>27.87</b>                                  | 30.87        | 49.23        | 42.36        | <b>28.06</b> | 19.14        | <b>32.92</b> | <b>12.53</b>                               | 13.76        | 0.53        | 10.84        | 9.42        | <b>1.351</b> |
| Mistral-7B-Instruct, KV Size = 1024 |                                               |              |              |              |              |              |              |                                            |              |             |              |             |              |
| PyramidKV                           | 24.28                                         | 30.05        | 49.17        | 40.49        | 26.43        | 18.80        | 31.54        | 11.77                                      | 14.51        | 0.51        | 10.19        | 9.25        | -            |
| SnapKV                              | 25.38                                         | 30.22        | 49.29        | 41.84        | 26.60        | 18.08        | 31.90        | 11.69                                      | 13.89        | 0.52        | 10.54        | 9.16        | -            |
| HeadKV-R                            | 25.87                                         | 31.44        | 49.55        | 41.95        | 27.09        | <b>19.88</b> | 32.63        | 12.21                                      | 14.17        | 0.50        | <b>10.58</b> | 9.37        | 1.5          |
| HeadKV-R2                           | 25.64                                         | <b>32.54</b> | <b>50.49</b> | 41.80        | 27.88        | 18.89        | 32.87        | 11.94                                      | <b>14.93</b> | 0.50        | 10.49        | 9.47        | 1.01         |
| REAL                                | <b>26.77</b>                                  | 31.99        | 48.98        | <b>42.61</b> | <b>28.04</b> | 19.35        | <b>32.96</b> | <b>12.82</b>                               | 14.82        | 0.50        | 10.33        | <b>9.62</b> | <b>1.351</b> |

## F THE USE OF LLMs

We used LLMs to assist with grammar checking and correction. All ideas and technical content were entirely developed by the authors.
